# Supplementary material for: Validation and Functional Analysis of Reference and Tissue-Specific Genes in Adipose Tissue of Freshwater Drum, Aplodinotus grunniens, under Starvation and Hypothermia Stress
Source: MDPI journal article supplement (doi:10.3390/cells12091328), 2023-05-06
Supplement: s1 [file s1]

# Validation and Functional Analysis of Reference and Tissue-Specific Genes in Adipose Tissue of Freshwater Drum, *Aplodinotus grunniens* under Starvation and Hypothermia Stress

Miaomiao Xue<sup>1</sup>, Haibo Wen<sup>1,2</sup>, Pao Xu<sup>1,2</sup>, Jianxiang Chen<sup>1</sup>, Qingyong Wang<sup>1</sup>, Yongkai Tang<sup>1,2</sup>, Xueyan Ma<sup>1,2</sup>, Guohua Lv<sup>1,2</sup>, Changyou Song<sup>1,2,\*</sup>, Hongxia Li<sup>1,2,\*</sup>

## Supplementary Materials:

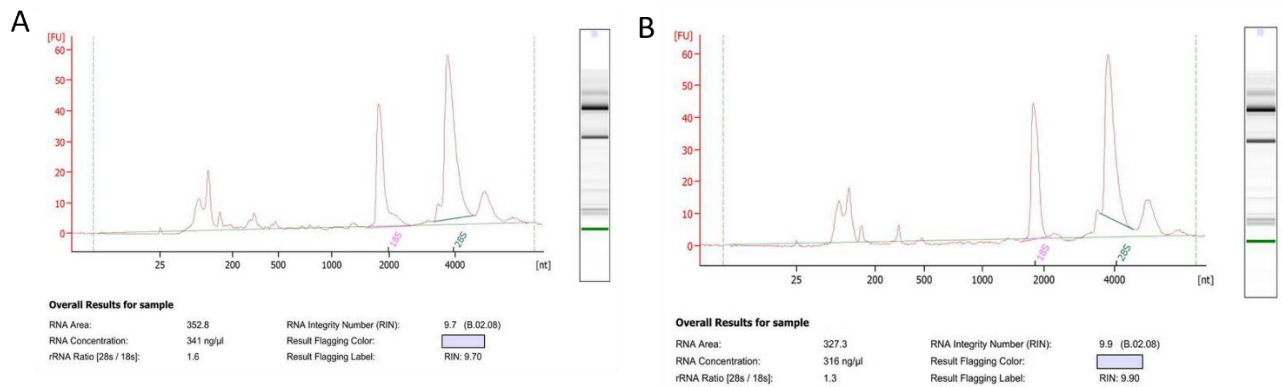

**Figure S1. RNA integrity number by RNA 6000 Nano LabChip for the samples.**

The concentration degree of each peak in the figure represents the integrity of RNA in the sample. The peak concentration represents a low degradation rate of RNA in the sample. The RIN value represents the integrity of the RNA sample, with higher values indicating better RNA integrity.

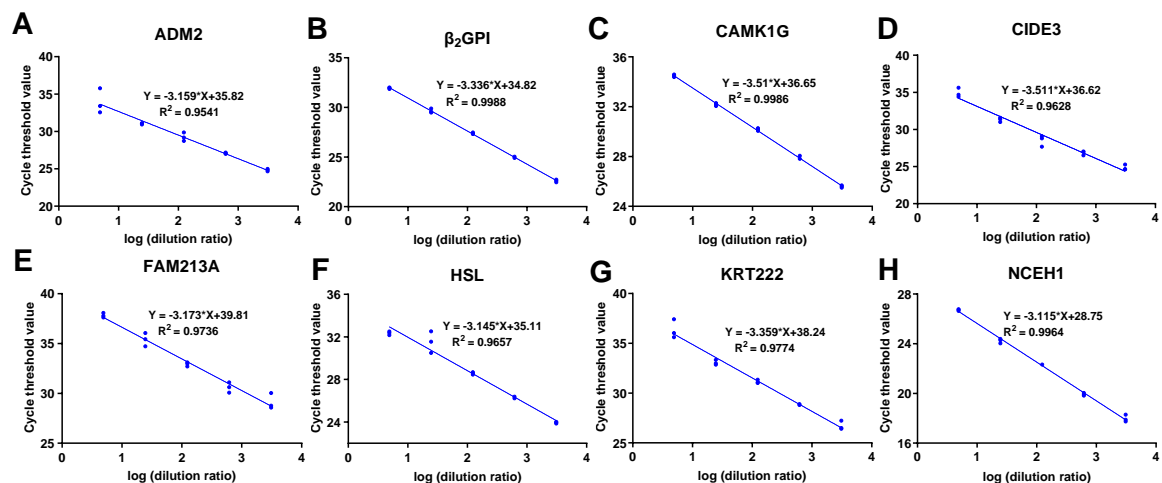

**Figure S2. Standard curve of tissue-specific candidate genes in *A. grunniens*.**

(A), adrenomedullin 2, ADM2; (B), beta-2-glycoprotein 1-like,  $\beta_2$ GPI; (C), calcium/calmodulin-dependent protein kinase type 1G, CAMK1G; (D), cell death activator CIDE-3-like, CIDE3; (E), redox-regulatory protein FAM213A-like, FAM213A; (F), hormone-sensitive lipase, HSL; (G), keratin-like protein KRT222,

KRT222; (H), neutral cholesterol ester hydrolase 1, NCEH1.

Table S1. Bestkeeper Standard Deviation and coefficient of variation

| Reference<br>gene | RPS4 | $\beta$ -actin | RPI7 | 60SRP | EF1 $\alpha$ | ufm1 | B2M  | EEF1B | SEC62 | 18S   | GAPDH |
|-------------------|------|----------------|------|-------|--------------|------|------|-------|-------|-------|-------|
| SD                | 0.91 | 0.93           | 1.04 | 1.14  | 1.37         | 1.79 | 1.81 | 1.85  | 2.15  | 3.46  | 3.80  |
| CV                | 4.36 | 4.70           | 5.46 | 6.20  | 6.75         | 6.31 | 9.22 | 8.42  | 7.45  | 14.52 | 15.88 |
